# Supplementary material
Source: publisher figshare collection journal article supplement (https://gsajournals.figshare.com/ndownloader/files/25816562)
Supplement: Supplementary file 1 [file 25816562]

**
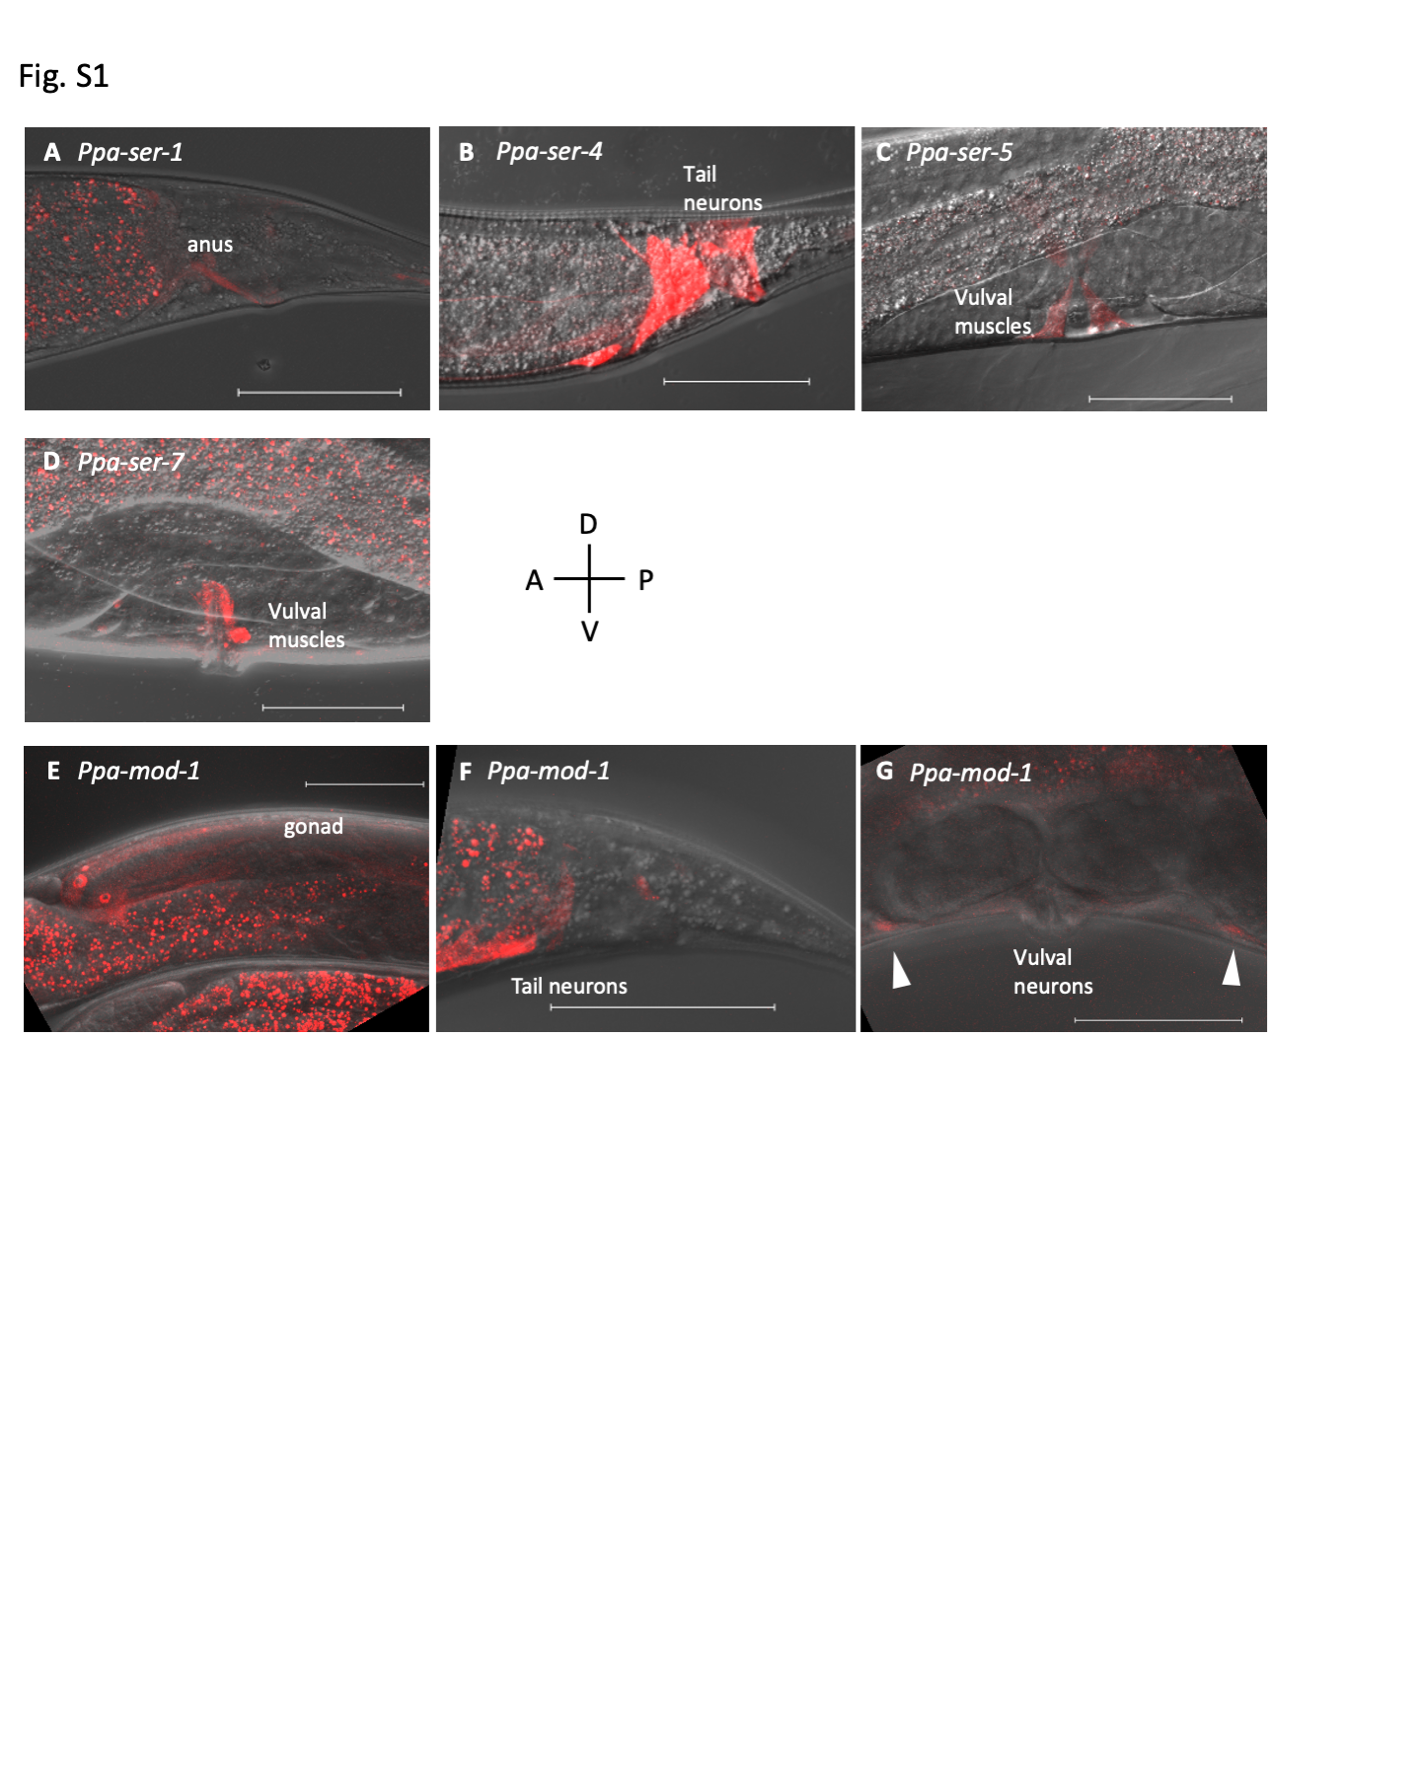
**

**Figure S1.** Expression patterns of serotonin receptors in other tissues.

Figures show merged images of turboRFP fluorescence (shown in red) and DIC images in the reporter animals of serotonin receptors. (A), (B), and (F) are posterior images; (C), (D), and (G) are images of the midsection; (E) is an image of the body posterior to the pharynx. All images were acquired from adult hermaphrodites.

(A) *Ppa-ser-1* was weakly expressed in the anus. (B) *Ppa-ser-4* was expressed in several tail neurons. (C) *Ppa-ser-5* was expressed in the vulval muscles. (D) *Ppa-ser-7* was expressed in the vulval muscles. (E-G) *Ppa-mod-1* was expressed in gonadal cells and tail neurons. A, anterior. P, posterior. D, dorsal. V, ventral. Scale bars, 50 µm.
